# Supplementary material for: A375 melanoma-derived lactate controls A375 melanoma phenotypes by inducing macrophage M2 polarization via TCA cycle and TGF-β signaling
Source: PeerJ. 2025 Feb 21;13:e18887. doi: 10.7717/peerj.18887 (PMC11849511; doi:10.7717/peerj.18887)
Supplement: Supplemental Information 4 [file peerj-13-18887-s004.xlsx]

## Sheet: Figure1-6
	Figure 1B	Control	PIG1-CM	A375-CM		Figure 2B	Control		PIG1-CM		A375-CM			Figure 3B	control	control+lactate	PIG1-CM	PIG1-CM+lactate	A375-CM	A375-CM+AZD3965		Figure 4A	t	PIG1			A375
		72679	69754	54765			Normoxia	Hypoxia	Normoxia	Hypoxia	Normoxia	Hypoxia			72679	70543	69754	61985	54765	60984			1.30479	15.1	16.8	13.5	16.8	19.2	22.2										Figure 5A		Control			PIG1-M-CM			A375-M-CM
		89543	82654	63217			72679	69876	69754	64674	54765	44276			89543	83654	82654	74575	57953	65768			7.81845	14.8	16.1	13.7	15.9	18.5	22.5											24h	0.418	0.346	0.478	0.435	0.391	0.492	0.492	0.45	0.535
		83219	75395	48396			89543	84493	82654	76564	63217	53654			83219	75537	75395	67548	48396	57345			14.3327	14.4	16.5	13.9	14.1	17.8	21.9											48h	1.378	1.255	1.479	1.502	1.408	1.67	2.041	1.845	2.235
		68543	58879	48348			83219	76932	75395	74569	48396	37654			68543	63903	58879	49786	63217	73875			20.9566	27.2	34.9	30.1	38.5	40.1	48.9											72h	1.876	1.78	2.045	2.064	1.865	2.254	2.683	2.421	2.892
		72868	76549	55438			68543	65932	58879	53985	48348	33958			72868	62798	76549	68754	55438	64536			27.4874	26.5	34.2	33.8	41.2	45.7	52.1
		74208	76329	57953			72868	70583	76549	65584	55438	44326			74208	65874	76329	67874	48348	58764			33.9672	28.3	35.5	32.4	50.8	49.2	55.8
							74208	71384	76329	70954	57953	46543											40.6027	30.2	34.8	35.9	53.7	48.5	61.9
																							47.1327	32.5	36.2	37.7	54.9	47.8	63.2
	Figure 1D	Control	PIG1-CM	A375-CM		Figure 2D	Control		PIG1-CM		A375-CM			Figure 3D	control	control+lactate	PIG1-CM	PIG1-CM+lactate	A375-CM	A375-CM+AZD3965			53.6218	31.7	36	37.1	52.6	49.7	62.7										Figure 5C	Control	PIG1-M-CM	A375-M-CM
		34124	40325	69437			Normoxia	Hypoxia	Normoxia	Hypoxia	Normoxia	Hypoxia			34124	39542	40325	56524	64854	51541			60.2532	14.8	16.1	13.2	16.8	17.8	23.5											71	134	329
		35478	43256	67457			34124	36032	40325	49854	69437	87895			35478	43574	43256	54215	59654	48795			66.8227	14.1	15.5	12.8	16.2	17.5	20.6											56	114	297
		22145	32354	51654			35478	37437	43256	51943	67457	98706			22145	26461	32354	40125	51654	45487			73.3457	13.1	14.2	13.5	15.2	18.8	21.5											82	148	357
		37654	52985	63534			22145	24346	32354	39045	51654	73905			37654	45158	52985	65354	69437	58363
		25478	34327	59654			37654	41729	52985	61485	63534	78965			25478	31542	34327	44358	67457	53584
		29875	38543	64854			25478	28876	34327	39654	59654	116234			29875	37854	38543	51862	63534	49765
							29875	31731	38543	45876	64854	89764										Figure 4B	t	PIG1			A375
																							1.30479	61	54.2	68.8	43.5	48.2	58.4
	Figure 1F	Control	PIG1-CM	A375-CM		Figure 2F	Control		PIG1-CM		A375-CM			Figure 3F	control	control+lactate	PIG1-CM	PIG1-CM+lactate	A375-CM	A375-CM+AZD3965			7.81845	57.6	54.9	67.5	42.1	46.6	57.6										Figure 5E		Control			PIG1-M-CM			A375-M-CM
		11442	16873	21214			Normoxia	Hypoxia	Normoxia	Hypoxia	Normoxia	Hypoxia			11442	13213	16873	22354	28574	20654			14.3327	54.2	53.5	63.7	41.5	45.2	56.1											G0/G1	77.61	68.76	81.65	67.24	62.35	71.29	51.21	54.42	47.54
		17498	22321	31402			11442	12132	16873	21342	21214	41535			17498	21054	22321	27845	18839	19532			20.9566	25.2	21.8	30.8	17.1	20.5	28.2											S+G2/M	22.38	31.24	18.35	32.76	37.65	28.7	48.79	45.58	52.46
		18408	24329	32231			17498	19765	22321	27378	31402	34532			18408	21014	24329	32145	32231	21498			27.4874	24.1	21.1	29.2	17.8	19.7	28.6
		12453	19983	23204			18408	19954	24329	28345	32231	29376			12453	15478	19983	27984	31402	22326			33.9672	23.5	22.5	28.7	16.5	19.4	27.5
		15483	20432	28574			12453	14632	19983	25326	23204	28765			15483	17995	20432	27154	21214	17834			40.6027	70.2	57.8	75.1	45.8	55.4	57.8
		10473	13385	18839			15483	17254	20432	26375	28574	38976			10473	11954	13385	16245	23204	21569			47.1327	68.2	58.9	72.5	44.1	53.4	56.8
							10473	12432	13385	16738	18839	33876											53.6218	66.9	55.4	70.5	45.5	53.5	55.6
																							60.2532	21.9	19.7	24.6	15.4	17.1	24.1
	Figure 1G	Control	PIG1-CM	A375-CM		Figure 2G	Control		PIG1-CM		A375-CM			Figure 3G	control	control+lactate	PIG1-CM	PIG1-CM+lactate	A375-CM	A375-CM+AZD3965			66.8227	20.3	19.5	23.8	15.1	16.5	24.5										Figure 5G	Control	PIG1-M-CM	A375-M-CM
		6.89	6.97	6.8			Normoxia	Hypoxia	Normoxia	Hypoxia	Normoxia	Hypoxia			6.89	6.87	6.97	6.68	3.13	3.33			73.3457	19.7	20.8	23.9	14.9	16.1	23.2											8.14	5.67	1.85
		5.07	5.13	4.9			6.89	6.06	6.97	6.43	6.8	4.66			5.07	4.58	5.13	4.87	4.9	5																				7.32	4.76	1.44
		2.01	1.92	3.13			5.07	4.92	5.13	4.84	4.9	6.4			2.01	1.89	1.92	1.69	4.5	4.55																				6.85	6.12	2.36
		5.86	5.2	4.95			2.01	2.08	1.92	2.22	3.13	5.91			5.86	5.74	5.2	4.84	6.22	5.8		Figure 4C	t	0mM		0.04mM			0.2mM			1mM			5mM
		2.95	4	4.5			5.86	5.97	5.2	5.37	4.95	4.68			2.95	2.75	4	3.49	4.95	5.65			1.30479	11.3	12.8	11.2	10.1	10.5	11.8	10.5	10.8	8.9	7.8	8.2	6.7	7.8	7.9
		6.11	6.03	6.22			2.95	2.79	4	3.23	4.5	6.8			6.11	5.87	6.03	5.58	6.8	6.8			7.81845	12.5	13.7	12.2	11.8	10.7	12	11.1	10.2	8.9	7.5	8.6	5.8	7.2	6.8
							6.11	6.05	6.03	5.75	6.22	3.56											14.3327	12.5	13.8	11.4	10.5	11.2	11.1	10.8	11.8	8.7	7.4	8.4	5.4	6.8	6.7
																							20.9566	36.4	33.8	36.1	35.8	34.5	32.4	32.8	31.5	25.5	21.8	20.5	17.5	16.9	19.7
	Figure 1H	Control	PIG1-CM	A375-CM		Figure 2H	Control		PIG1-CM		A375-CM			Figure 3H	control	control+lactate	PIG1-CM	PIG1-CM+lactate	A375-CM	A375-CM+AZD3965			27.4874	37.4	34.9	41.2	33.1	34.5	38.2	28.9	30.2	25.5	21.2	21.5	17.2	17.6	19.1		Figure 5I	Control	PIG1-M-CM	A375-M-CM
		11.1	133.01	431.28			Normoxia	Hypoxia	Normoxia	Hypoxia	Normoxia	Hypoxia			11.1	15.2	133.01	197.21	251.92	287.21			33.9672	36.5	35.4	40.3	32.5	33.1	37.3	29.5	30.1	26.3	22.5	21.8	18.4	17.9	21.8			50	89	196
		5.12	65.09	251.92			11.1	13.25	133.01	173.83	431.28	665.21			5.12	8.11	65.09	105.23	328.43	204.36			40.6027	41.8	42.1	43.5	42.2	43.6	39.5	42.2	37.6	32.2	23.7	23.6	21.8	19.1	22.4			42	73	169
		3.03	47.95	243			5.12	6.34	65.09	89.83	251.92	711.11			3.03	4.71	47.95	81.95	414.32	240.2			47.1327	45.2	44.7	44.5	43.2	45.7	43.5	41.9	40.7	32.5	24.9	24.7	21.5	19.5	23.2			56	95	209
		5.76	77.13	264.32			3.03	4.14	47.95	69.12	243	531.22			5.76	7.92	77.13	109.14	264.32	224.65			53.6218	46	42.1	45.7	45.8	44.8	42.7	41.8	40.8	33.7	25.4	25.8	21.1	19.1	21.9
		7.17	94.52	328.43			5.76	6.82	77.13	99.43	264.32	623.3			7.17	9.12	94.52	148.21	431.28	214.64			60.2532	12.1	11.2	9.5	10.5	10.8	9	10.1	10.2	8.2	7.9	7.5	6.4	5.7	7.4
		7.78	112.21	414.32			7.17	8.49	94.52	133.56	328.43	576.16			7.78	9.82	112.21	178.54	243	226.16			66.8227	11.5	10.8	8.1	9.5	9.8	9.1	10.5	9.8	8.8	7.2	7.1	6.1	5.4	7.8
							7.78	9.85	112.21	152.12	414.32	469.65											73.3457	10.2	10.5	8.7	9.2	9.5	9.7	10.2	10.5	8.4	6.6	6.9	6.5	4.9	7.1
																																							Figure 5K	Control	PIG1-M-CM	A375-M-CM
																						Figure 4D	t	0μM		0.063μM			0.25μM			1μM			4μM					21	32	159
																							1.30479	48.2	54.1	41.6	52.1	45.2	43.2	53.1	38.6	33.2	45.6	32.4	30.9	40.6	28.4			15	23	121
																							7.81845	49.9	52.5	42.6	51.2	46.9	42.9	52.8	38.2	33	44.8	32.2	30.5	39	28.1			33	41	176
																							14.3327	47.5	53.1	41.3	50.1	43.5	43.5	52.1	37.3	33.8	44.1	31.3	30.2	38.1	27.5
																							20.9566	17.8	21.8	13.8	20.4	19.8	18.8	22.4	14.8	13.8	17.4	10.8	12.3	13.6	8.8
																							27.4874	18.1	22.2	13.1	20.7	19.9	18.1	21.7	14.1	14.1	17.7	10.5	11.5	13.9	9.2
																							33.9672	19.5	21.7	13.7	19.7	19	17.2	18.7	14.5	14.2	16.8	9.7	11.2	13.3	9.5
																							40.6027	59.8	65.8	53.1	66.9	57.2	55.1	65.9	52.7	39.5	48.9	37.7	35.5	41.7	33.2
																							47.1327	61.9	67.5	52.5	65.5	55.9	54.5	66.3	53.9	42.5	52.3	41.3	37.3	44.8	32.2
																							53.6218	65.4	68.5	53.9	64.5	54.4	53.4	64.1	52.1	43.9	54.1	43.5	39.5	43.1	31.7
																							60.2532	14.1	19.4	15.2	16.4	18.1	19.3	15.4	13.2	13.3	14.4	15.2	11.8	12.8	12.5
																							66.8227	13.7	18.7	14.8	15.1	17.2	18.9	14.1	12.8	12.9	15.1	14.8	11.1	13.1	11.8
																							73.3457	13.8	17.7	14.1	15.7	16.8	18.8	14.7	12.5	11.8	14.7	14.5	10.5	13	11.5
																						Figure 4F	Lactate	Lactate+2DG	Lactate+AA5
																							59974	54218	82186
																							45769	47543	61540
																							42874	38875	60432
																							58765	51326	77875
																							42187	35658	53765
																							47217	47876	65287
																						Figure 4H	Lactate	Lactate+2DG	Lactate+AA5
																							49745	44985	32658
																							65478	59852	45418
																							66541	64587	42864
																							59854	55489	38879
																							58485	52865	34125
																							64356	59548	41254
																						Figure 4J	Lactate	Lactate+2DG	Lactate+AA5
																							24768	19886	16759
																							22454	19865	16854
																							27653	25432	19984
																							27867	25654	21432
																							29543	30097	21432
																							25432	21345	18543
																						Figure 4K	Lactate	Lactate+2DG	Lactate+AA5
																							5.66	6.2	6.43
																							4.65	4.55	4.32
																							5.56	5.32	4.76
																							5.31	4.78	4.55
																							3.12	3.6	3.74
																							7.34	6.78	7.4
																						Figure 4L	Lactate	Lactate+2DG	Lactate+AA5
																							482.65	478.2	187.87
																							554.21	525.83	213.94
																							514.4	484.65	205.76
																							459.61	463.39	163.84
																							578.28	538.56	223.64
																							423.13	346.74	150.2

## Sheet: Figure S1-S3
	Figure S1A	0.21	0.05	0.03	0.02	0.01			Figure S2B	0	1	5	10	20	50	mM		Figure S3A	0	0.04	0.2	1	5	25	mM
		1.378	1.39	1.791	1.905	1.884				34124	35224	37245	39542	38342	35745				98.4	99.4	97.4	96.4	81.2	71.4
		1.255	1.451	1.885	1.847	1.968				35478	37184	38254	43574	42874	37785				99.5	97.2	98.6	93.6	73.8	64.5
		1.479	1.52	1.786	1.834	1.922				22145	23854	25547	26461	28261	26014				98.5	98.4	99.5	95.4	78.1	65.2
										37654	40178	42284	45158	45858	43985				97.4	97.8	96.4	93.8	83.1	72.2
										25478	26954	27884	31542	32242	30695				99.1	96.4	97.8	94.4	78.6	59.1
										29875	31024	32474	37854	37054	34257				99.1	99.5	98.4	95.2	85.3	73.3
	Figure S1B	0.21	0.05	0.03	0.02	0.01			Figure S2D	0	0.08	0.4	2	10	50	μM		Figure S3B	0	0.063	0.25	1	4	16	μM
		96.6	97.8	93.5	95.3	95.1				64854	67548	61874	58654	51541	52147				97.2	97.4	95.4	92.4	75.2	57.5
		98.1	95.3	96.3	98.2	93.7				59654	58471	57482	55672	48795	47587				99.1	97.9	96.2	93.1	73.6	59.5
		96.2	98.3	98.6	97.2	94.6				51654	49752	48654	45652	45487	45741				96.2	99.1	93.3	87.6	70.1	48.2
										69437	72417	68736	66324	58363	57542				94.8	95.8	96.8	91.2	73.1	52.6
										67457	68757	66874	62574	53584	49753				97.8	98.2	95.4	91.7	74.6	45.3
										63534	61478	62865	56842	49765	52724				98.1	97.4	95.1	94.8	78.3	53.1
	Figure S1C	0.21	0.05	0.03	0.02	0.01			Figure S2E	PIG1-CM	A375-CM
		92.2	90.5	91.9	79.8	79.7				5.5	28.45
		94.41	89.7	87.7	80.9	76.3				4.8	42.1
		92.34	93.2	90.8	76.5	75.3				8.5	35.2
